# Supplementary material
Source: PubMed Central journal article supplement (PMC7710139)

## SUPPLEMENTAL FIGURES

**Figure S1.** KO cells were validated by DNA sequencing. WT allele is indicated with the guide DNA sequence. Deletion or insertion in each clone is shown below the WT allele.

**Figure S2.** The correlation of TNKS and RNF146 based on published data. (A) The correlation of TNKS and RNF146 in normal (up plot) and tumor (down plot) tissue based TCGA mRNA calculated in GEPIA2. (B) The protein expression of RNF146 (up plot) and TNKS (down plot) in normal and tumor tissue based on CPTAC data calculated in UALCAN. (C) the cell growth curve of cells used in this study.

**Figure S3.** The protein changed by XAV939 treatment. (A and B) Volcano plot shows the significant change in differentially expressed proteins. Each dot represents a protein. The brown and olive dots indicate significantly up-regulated and down-regulated proteins, respectively. The known substrates of TNKS1/2 are labeled with gene names. Y axis is the  $-\text{Log p-value}$ , and X axis is the  $\text{Log}_2$  fold change. Tests were performed using a t-test filtered by  $p\text{-value} \leq 0.01$ , a fold change cut-off of 2 and unique peptide  $\geq 2$ . (C) Biological process enrichment analysis by Metascape for proteins upregulated by XAV939 treatment. (D) The protein upregulated by XAV939 treatment were compared with high-confidence predicted substrates of TNKS1/2 from Guettler et al's data [25] and high-confidence interaction proteins from Xu et al's data [26].

**Figure S4.** Double knockout of TNKS1/2 significantly changed the proteome compared with XAV939 treatment. (A and B) the correlation of protein change between TP53TNKS1/2TKO vs TP53KO and TP53TNKSTKO+XAV939 vs TP53KO or TP53TNKS1/2TKO vs TP53KO+XAV939. Each dot represents a protein. The brown and olive dots indicate significantly up-regulated and down-regulated proteins in TP53TNKS1/2TKO vs TP53KO, respectively. The known substrates of TNKS1/2 and validated proteins were labeled with gene names. (C) Proteins upregulated by double knockout of TNKS1/2 were compared with high-

confidence predicted substrates of TNKS1/2 from Guettler et al's data [25] and high-confidence interaction proteins from Xu et al's data [26]. (D) Immunoblot assay of whole cell extracts for NFATC2 in 293A and RNF146KO cells plus XAV939 treatment (10  $\mu$ M, 24 h). TNKS1/2 was used as positive controls, and  $\beta$ -actin was used as the loading control. (E) The correlation between the quantified proteome and transcriptome changes of each gene product in TP53TNKS1/2TKO vs TP53KO. The brown and olive dots indicate significantly up-regulated and down-regulated proteins in TP53TNKS1/2TKO vs TP53KO, respectively. The cross dot means gene products with adjusted p value  $\leq 0.01$  in transcriptome analysis. The dash line shows the cutoff of fold change 2 in transcriptome analysis. The known substrates of TNKS1/2, proteins validated by WB in this study and proteins with significant up-regulation in transcriptome were labeled with gene names.

**Figure S5.** (A) Proteins upregulated by knockout of RNF146 were compared proteins upregulated by double knockout of TNKS1/2 and proteins upregulated by XAV939 treatment. (B) Protein levels of OTUD5 treated with XAV939 (TNKSi) or olaparib (PARP1 inhibitor) in different cells as indicated. (C) The correlation between the quantified proteome and transcriptome changes of each gene product in RNF146KO vs 293A. The brown and olive dots indicate significantly up-regulated and down-regulated proteins in RNF146KO vs 293A, respectively. The cross dot means gene products with adjusted p value  $\leq 0.01$  in transcriptome analysis. The dash line shows the cutoff of fold change 2 in transcriptome analysis. The known substrates of RNF146, proteins validated by WB in this study and proteins with significantly up-regulated in transcriptome were labeled with gene names.

# Figure S1

## 293A\_TP53 KO cell

**TP53** sgRNA: GGTAAGAGGCTGGTGGACG

WT genome TTCCTGAAAACAACGTTCTGGTAAGGACAAGGGTTGGGCTGGGGACCTGGAGGGCTGG  
KO allele#1 TTCCTGAA-----TTCTGGTAAGGACAAGGGTTGGGCTGGGGACCTGGAGGGCTGG  
KO allele#2 TTCCTGAAAACAACG-----GGCTGG

## 293A\_RNF146 KO cell

**RNF146** sgRNA: TGAGCGCACTAGTAGAGAGC

WT genome AATGGGTGGTGGCAGTACGATGAGCGCACTAGTAGAGAGCTGGAAGATGCTTTTTTCCAAA  
KO genome AATGGGTGGTGGCAGTACGATGAGCGCACTAGT--AGAGCTGGAAGATGCTTTTTTCCAAA

## 293A\_TP53TNKS1/2 TKO cell

**TNKS** sgRNA: GGTAAGAGGCTGGTGGACG

WT genome GGGTAAAGAGGCTGGTGG ACGCGGCAAACGTAAATGCA  
KO allele#1 GGGTAAAGAGACTGGTGGG ACGCGGCAAACGTAAATGCA (+1nt and one mutation)  
KO allele#2 GGGTAAAGAGACTGGTGGG..ACGCGGCAAACGTAAATGCA (+169nt and one mutation)

**TNKS2** sgRNA: TCCAATTATCTCGAGCATTG

WT genome ATGGTGCAGACCCCAATGCTCGAGATAATTGGAATTATACTCCTCTCCATGAAGCTGCAATTAAA  
KO allele#1 ATGGTGCAGACCCCAATGCTCGA--TAATTGGA----TA-TCC-----AGCTGCAATTAAA  
KO allele#2 ATGGTGCAGACCCCAATGCTC----TAATTGGA----TA-TCCTCTCCATGAAGCTGCAATTAAA

**TP53** sgRNA: GGTAAGAGGCTGGTGGACG

WT genome TTCCTGAAAACAACGTTCTGGTAAGGACAAGGGTTGGGCTGGGGACCTGGAGGGCTGG  
KO allele#1 TTCCTGAA-----TTCTGGTAAGGACAAGGGTTGGGCTGGGGACCTGGAGGGCTGG  
KO allele#2 TTCCTGAAAACAACG-----GGCTGG

Figure S2

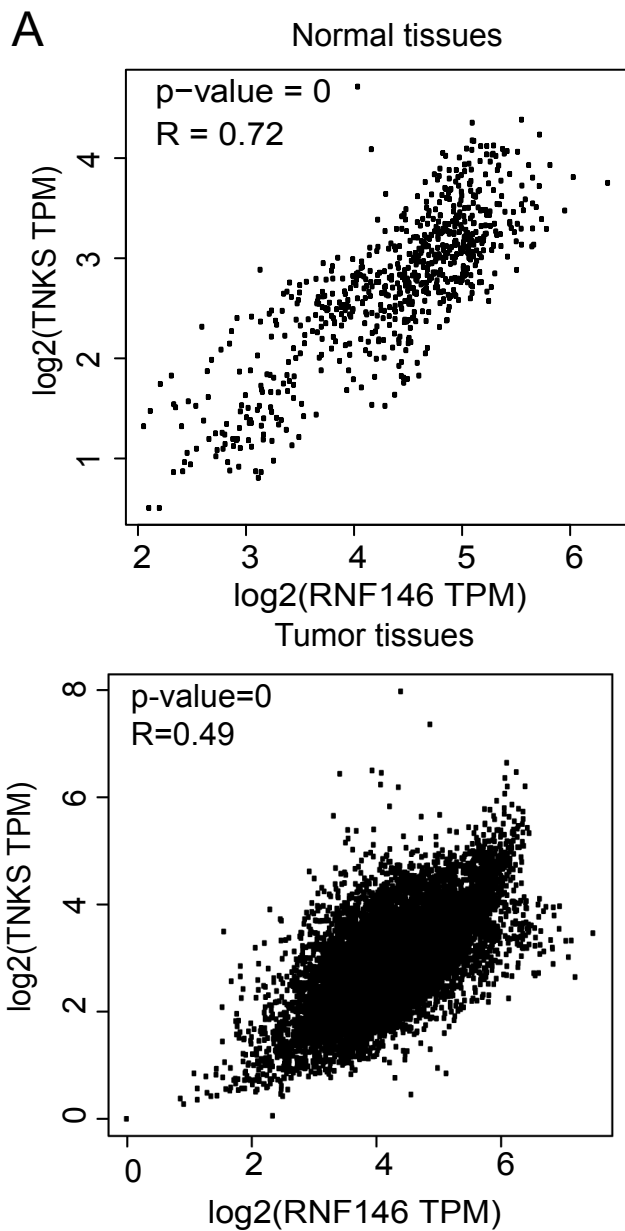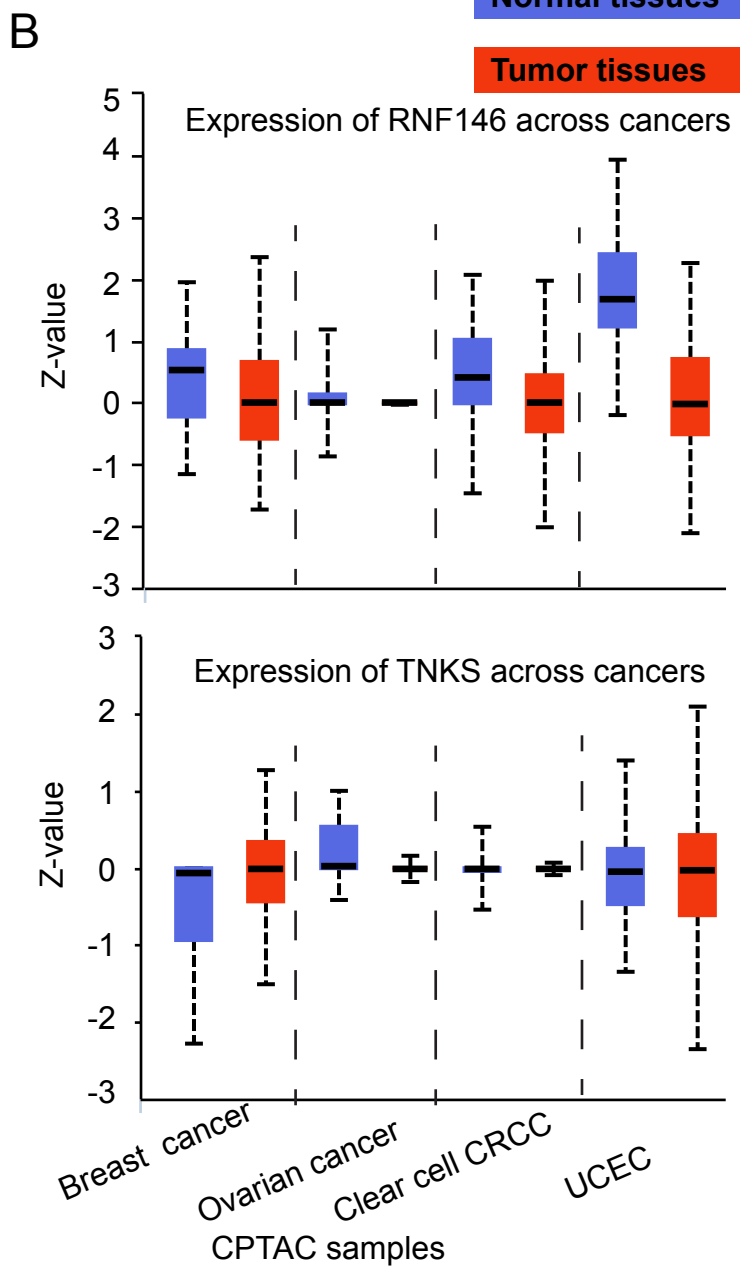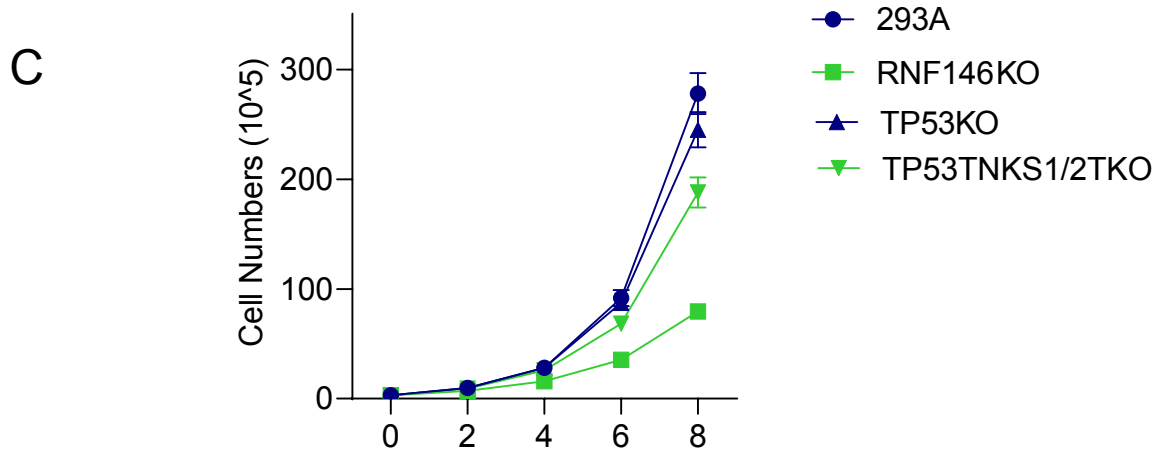

Figure S3

A

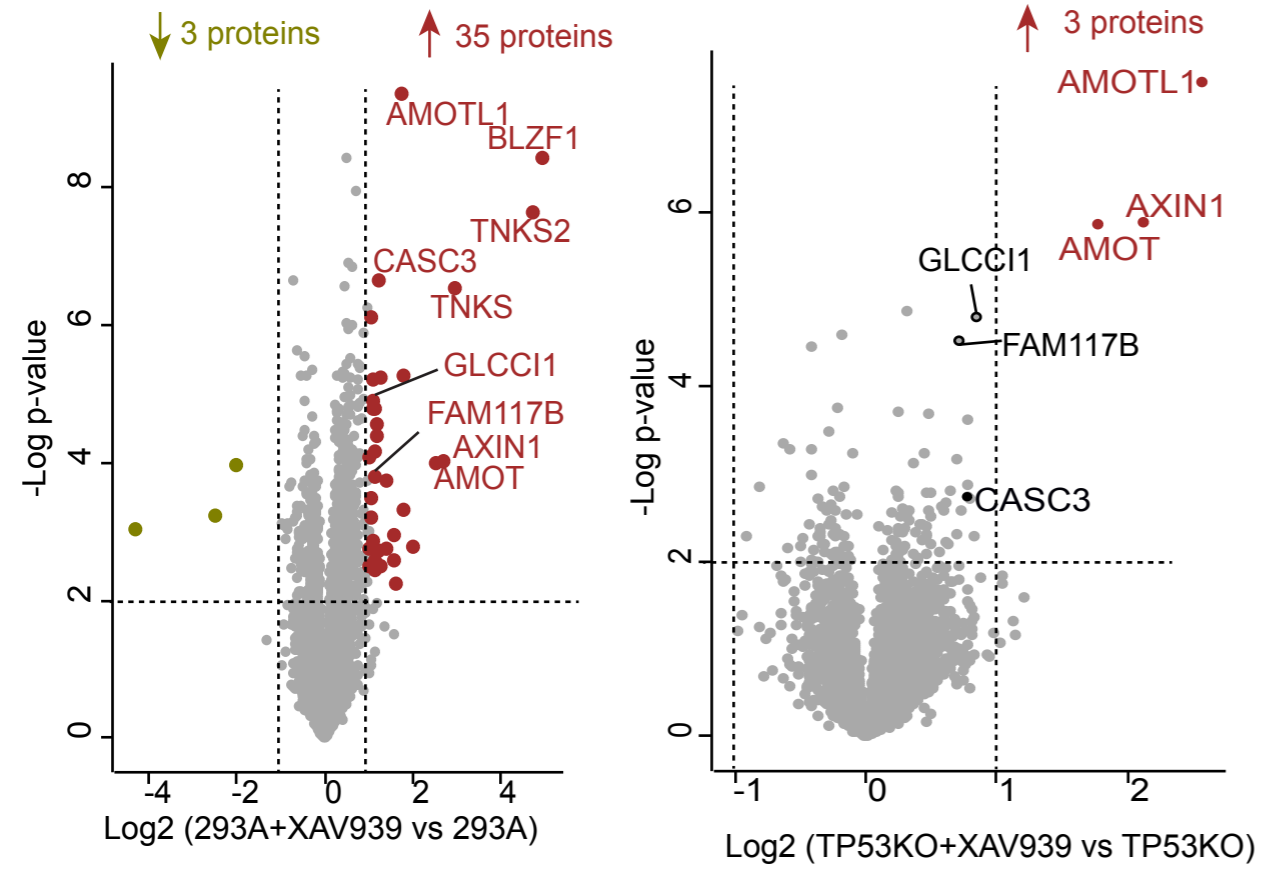

C

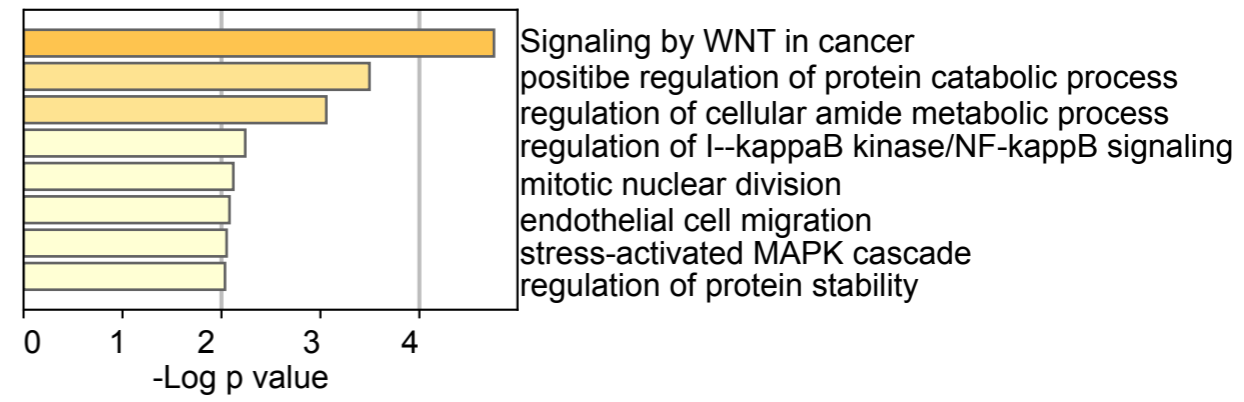

B

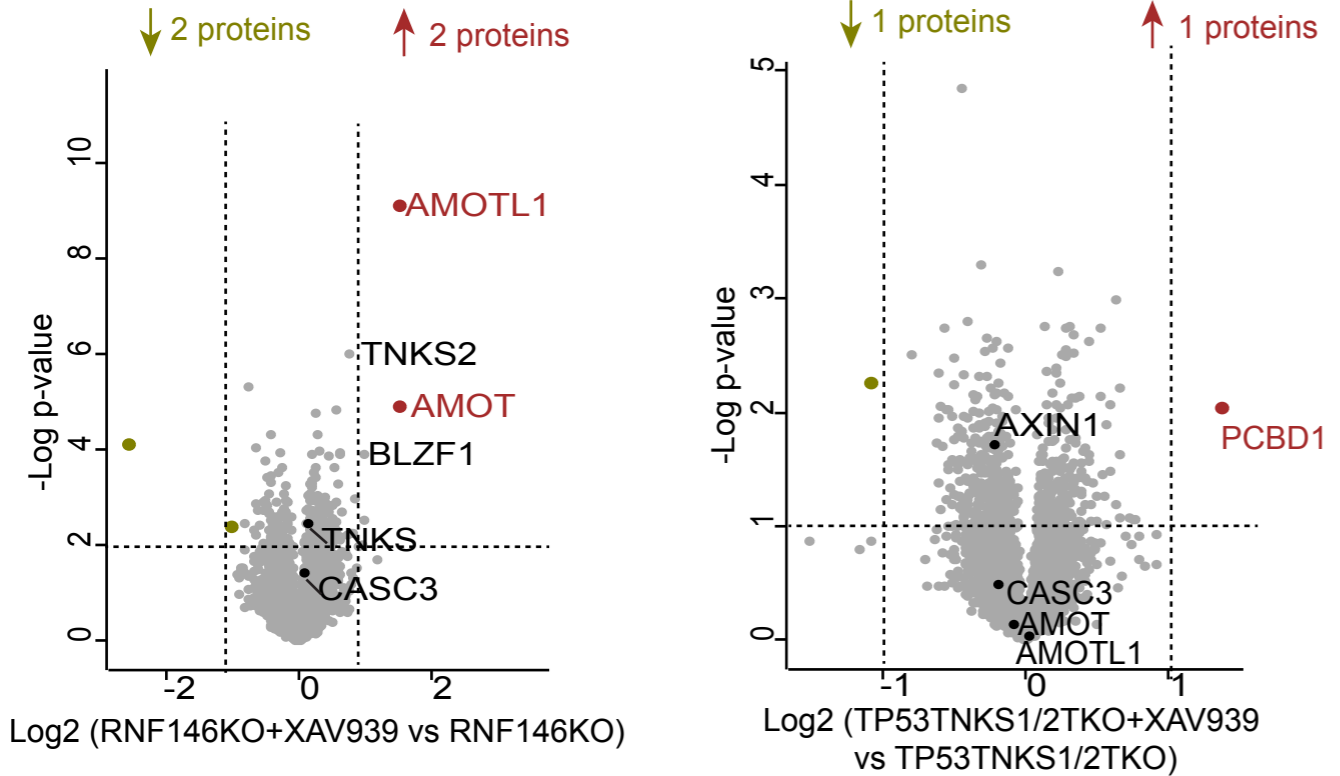

D

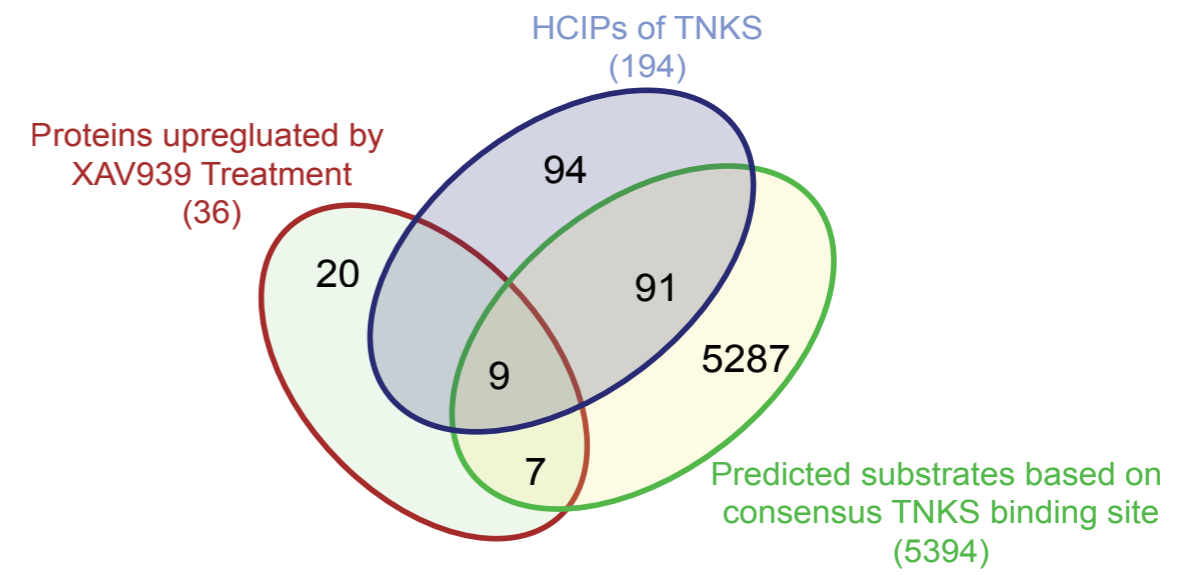

Figure S4

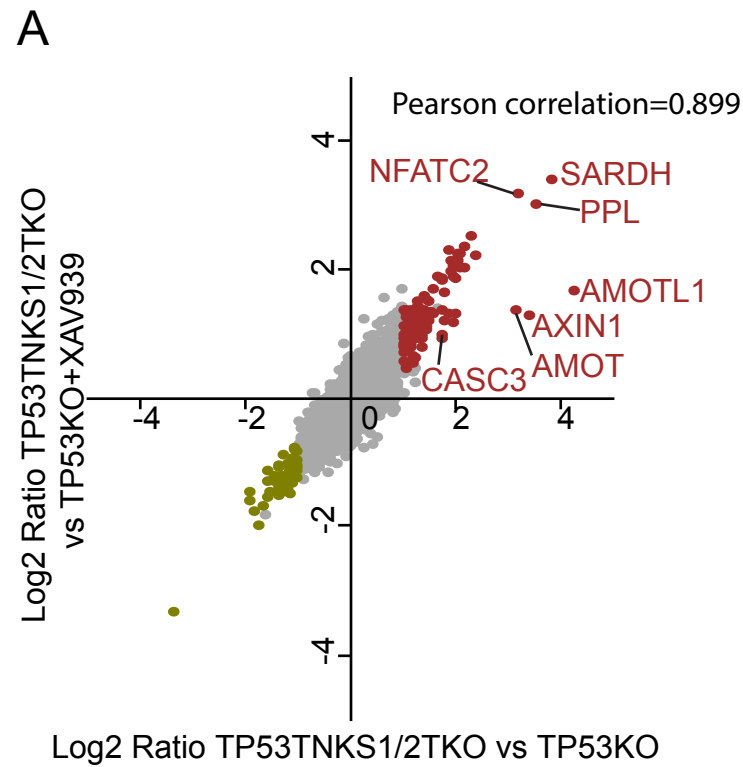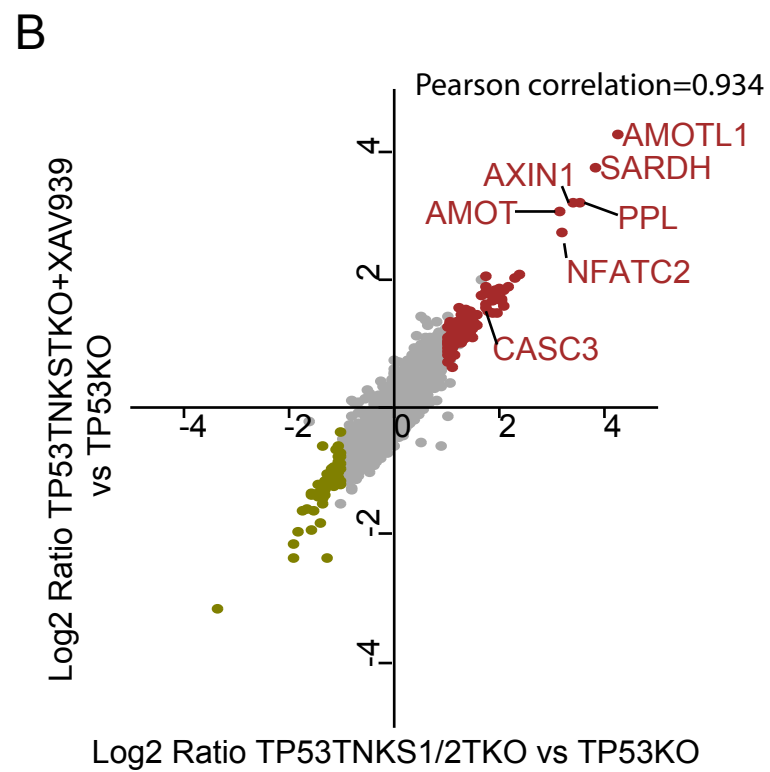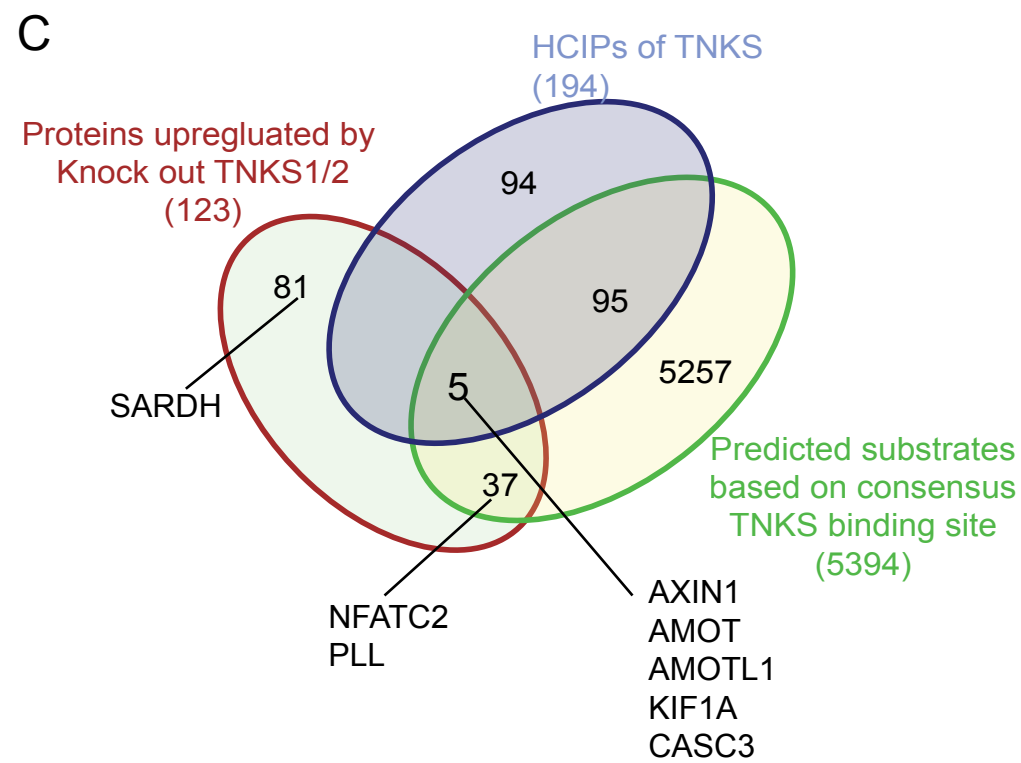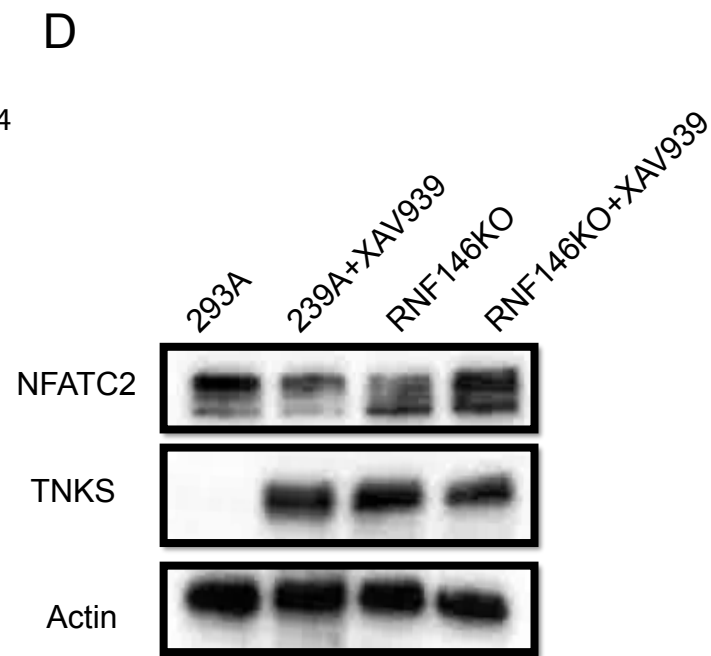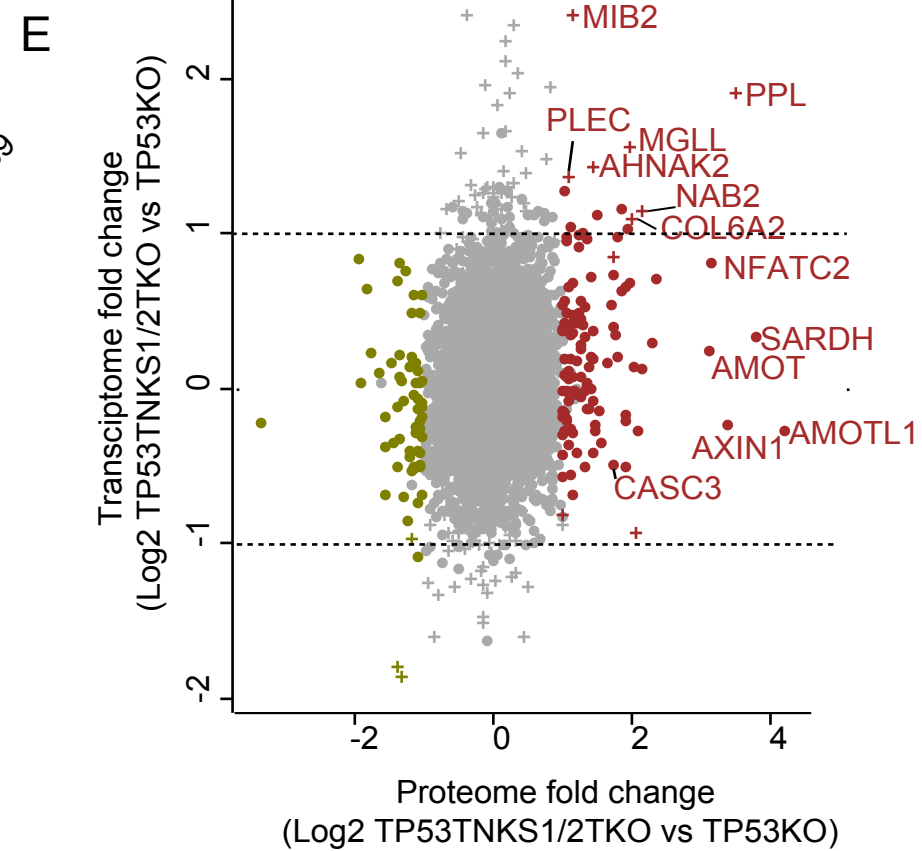

Figure S5

A

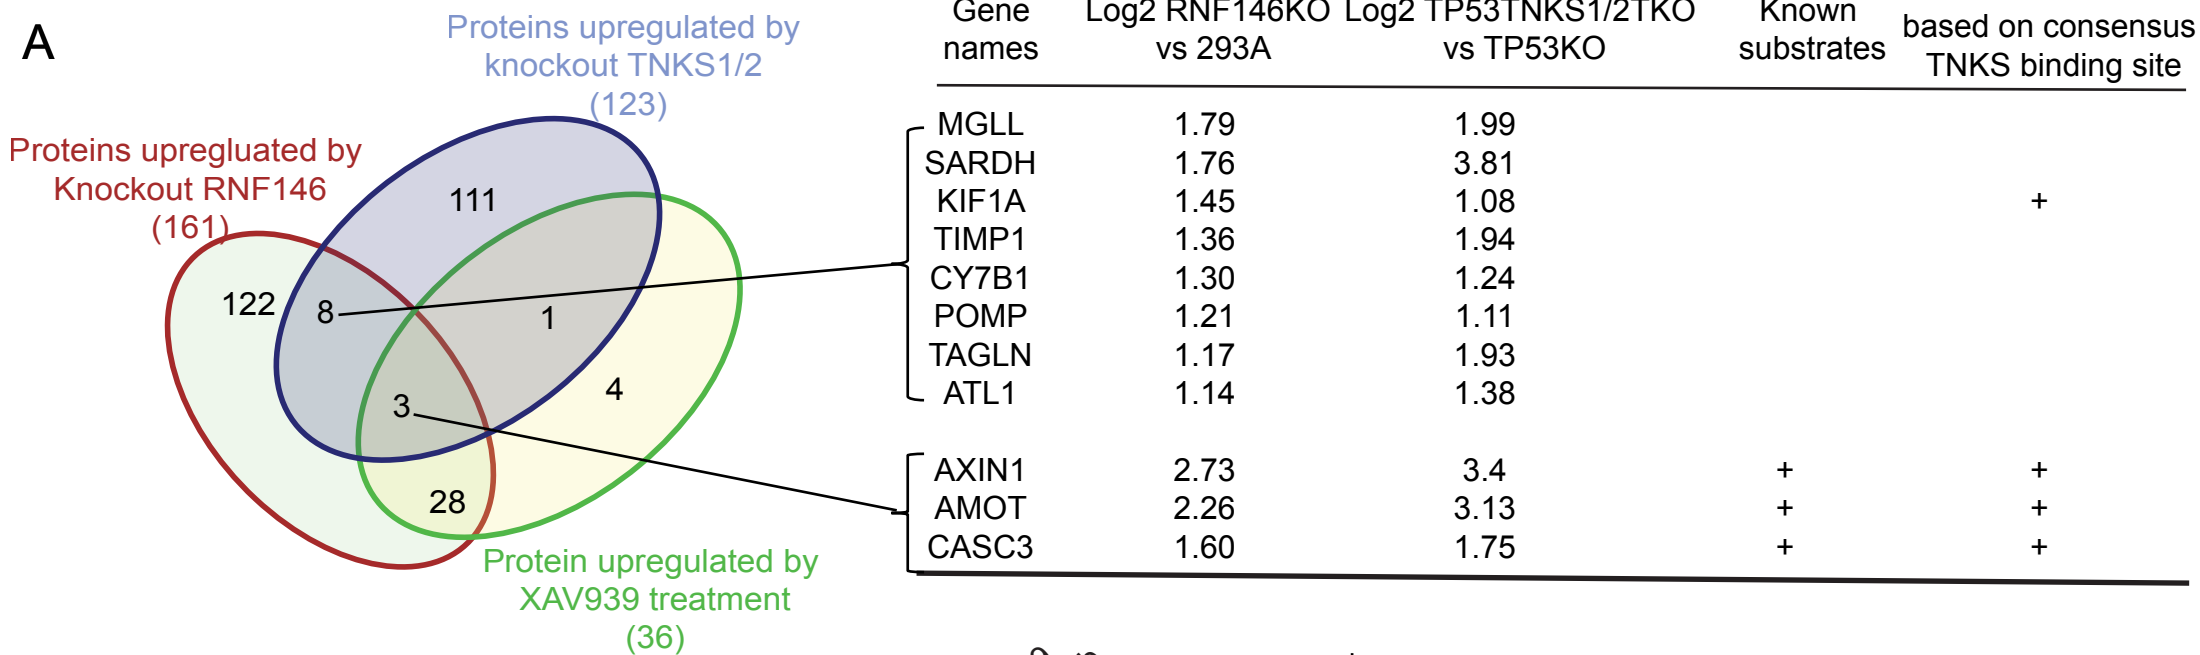

B

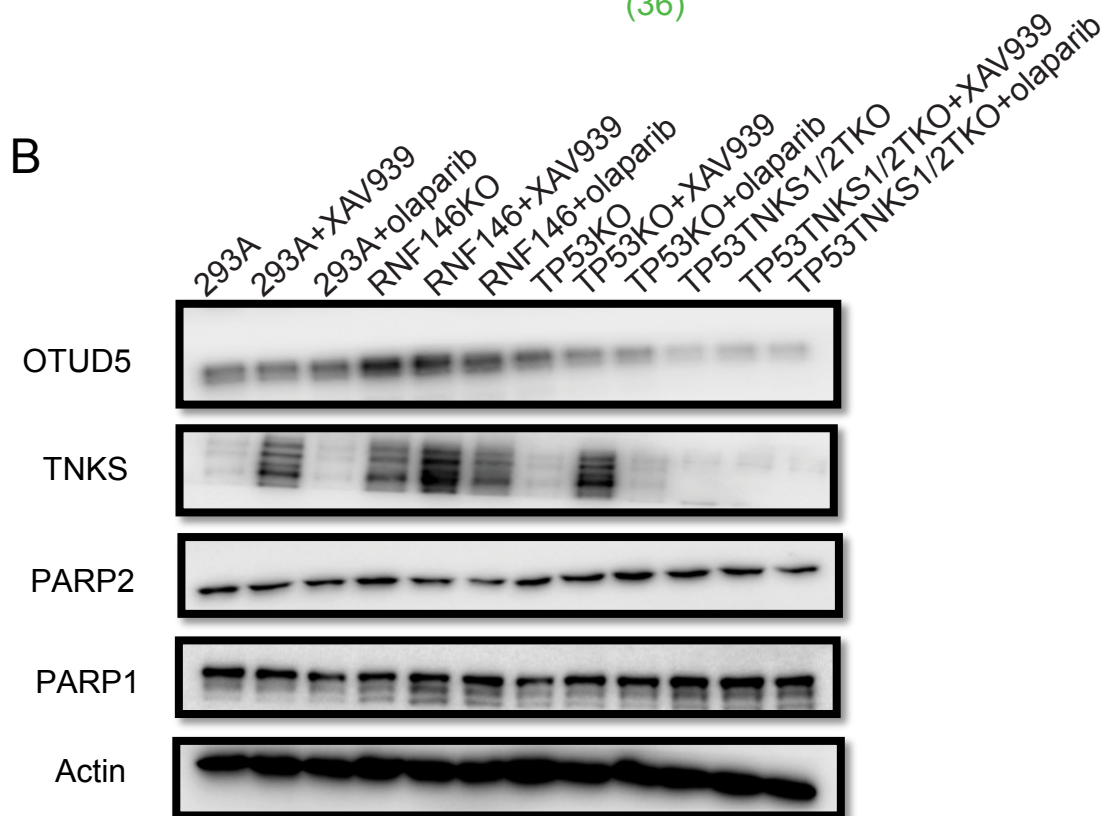

C

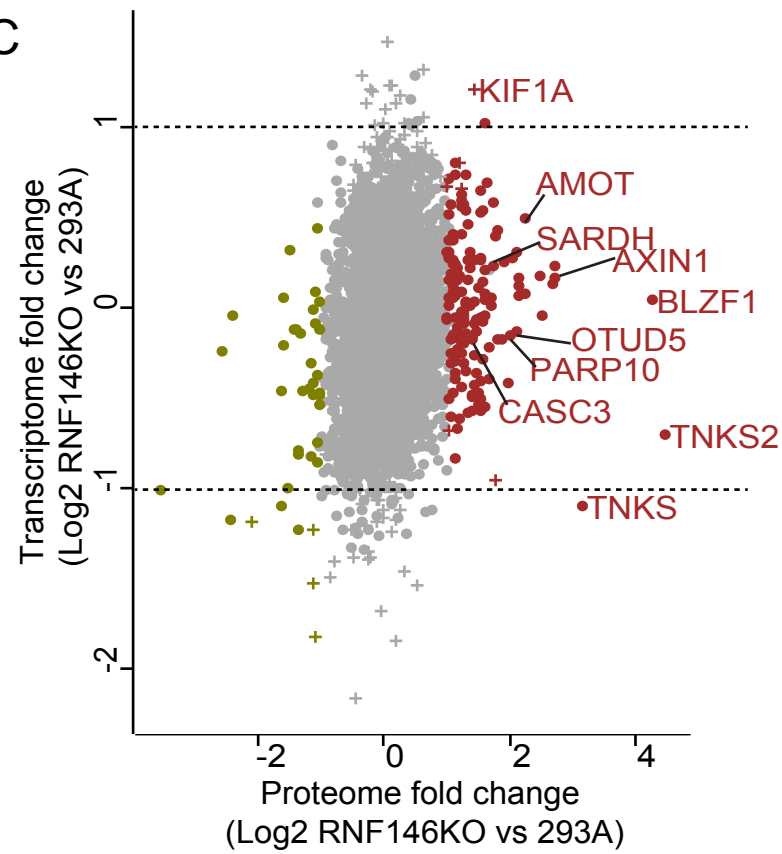

Supplement: 162912_0_supp_580787_q1yx65.pdf [file 162912_0_supp_580787_q1yx65.pdf]
